# Supplementary material for: PRMT1 reverts the immune escape of necroptotic colon cancer through RIP3 methylation
Source: PubMed Central journal article supplement (PMC10067857; doi:10.1038/s41419-023-05752-w), 2023-04-01

**Fig. 1A**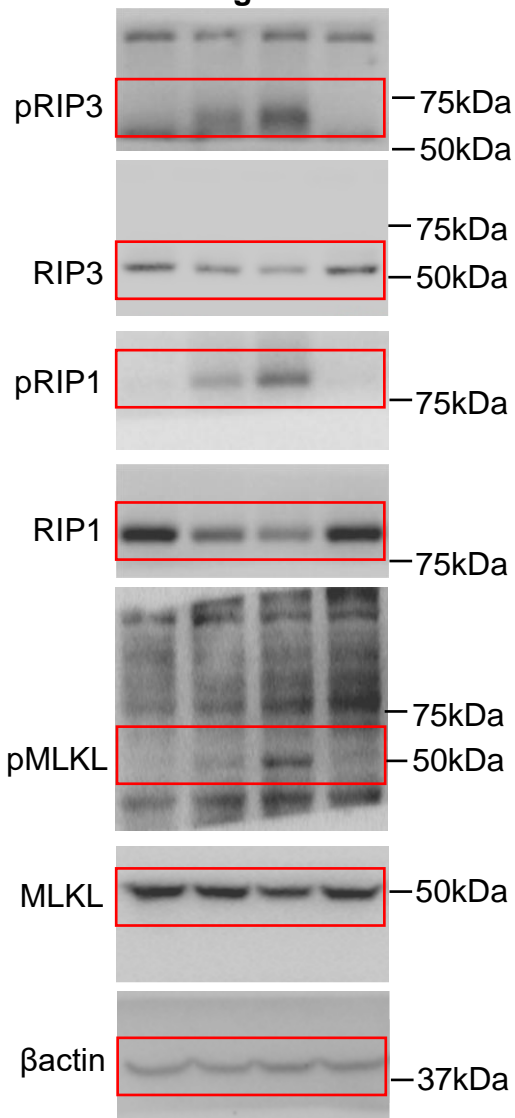**Fig. 1B**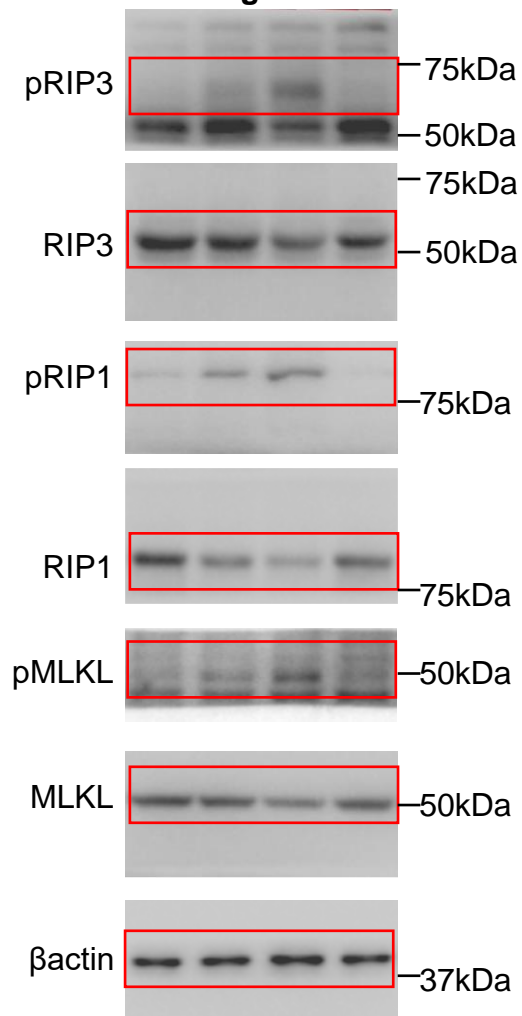**Fig. 1D**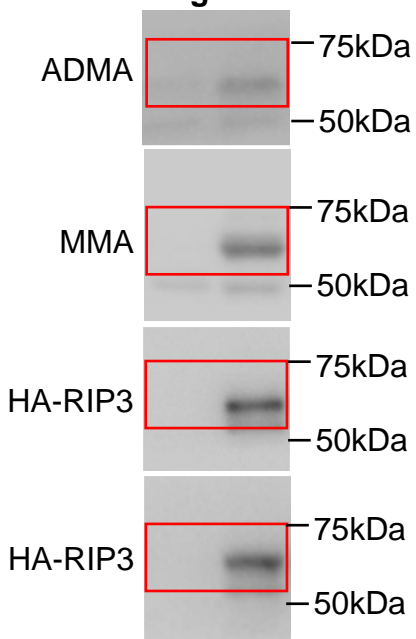**Fig. 1E**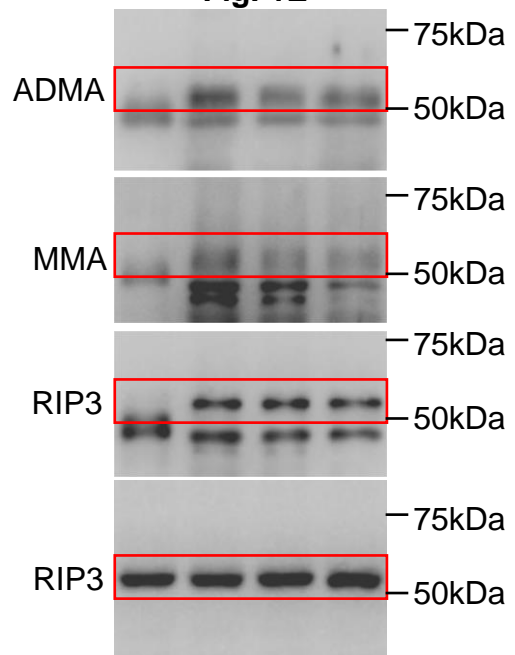

**Fig. 1I**

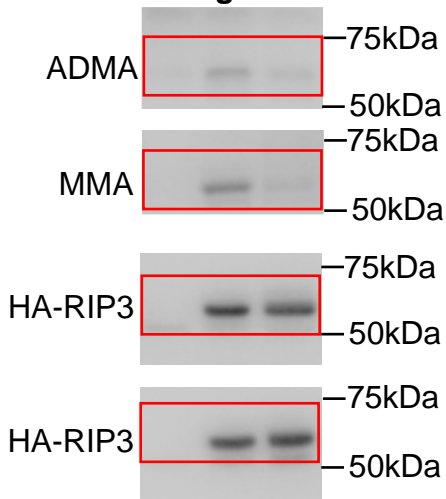

**Fig. 1J**

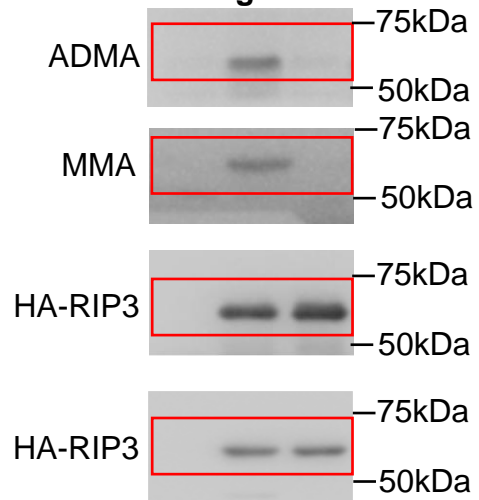

**Fig. 1K**

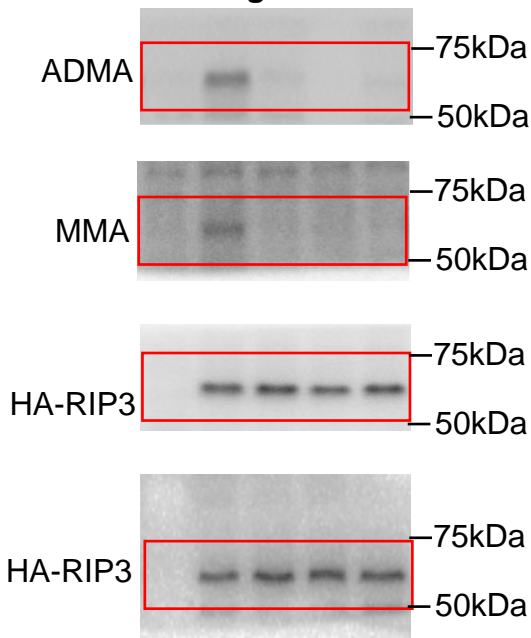

**Fig. S1A**

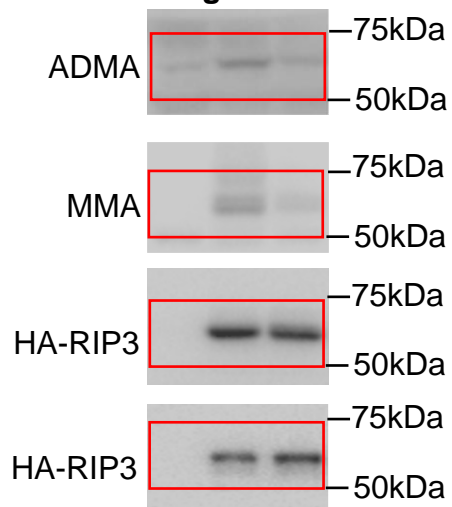

**Fig. S1B**

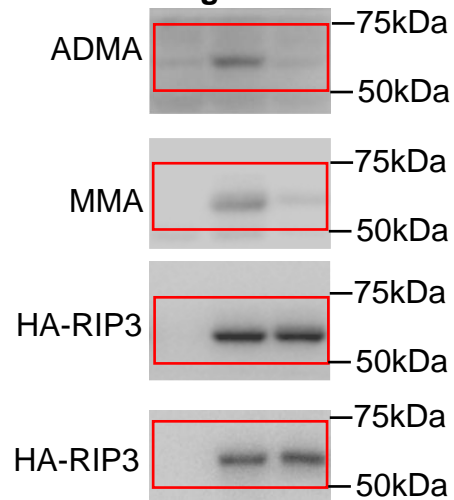

**Fig. 2A**

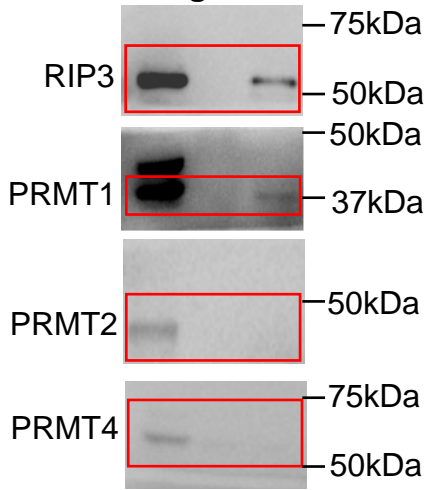

**Fig. 2B**

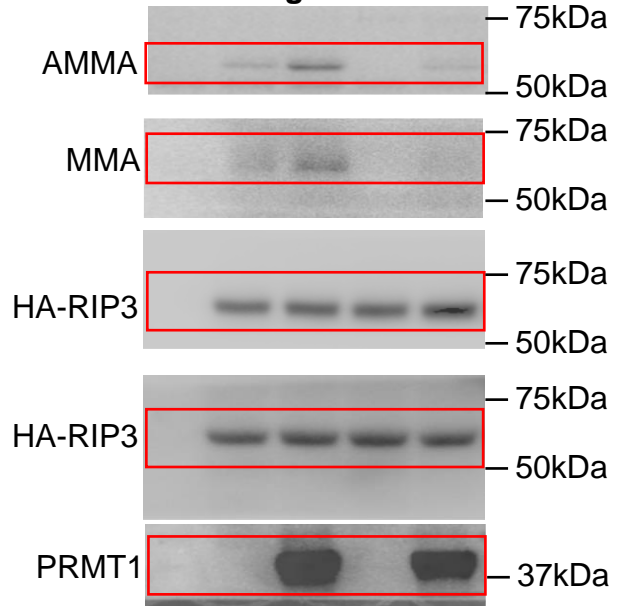

**Fig. 2C**

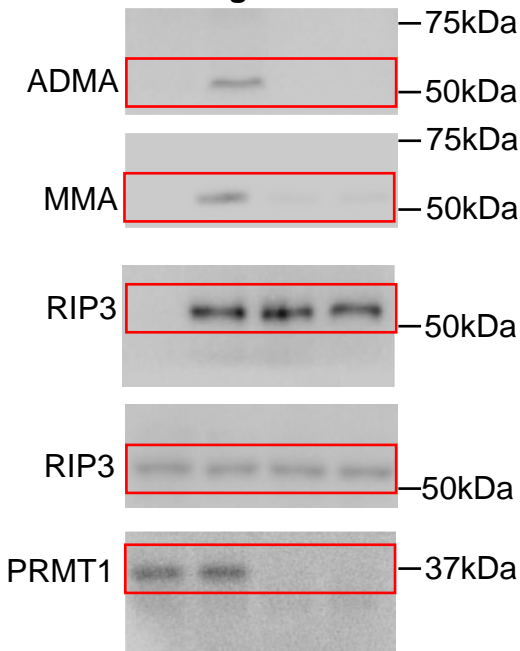

**Fig. 2D**

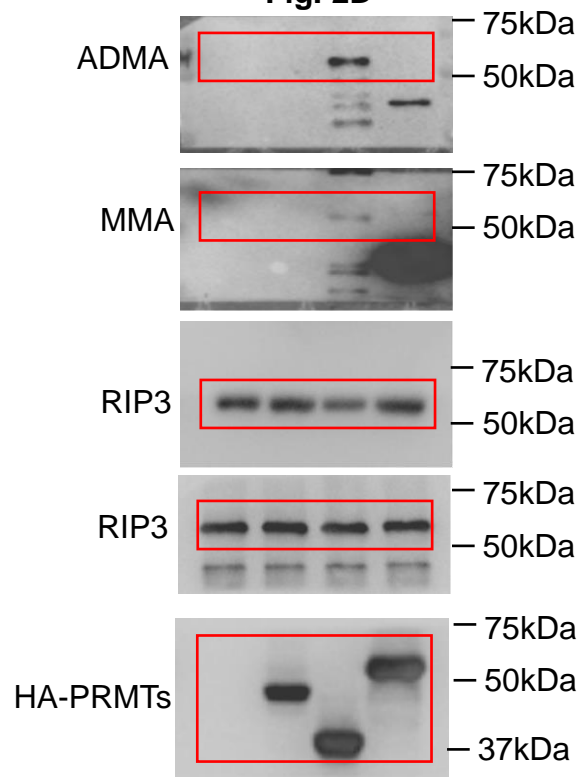

**Fig. 2E**

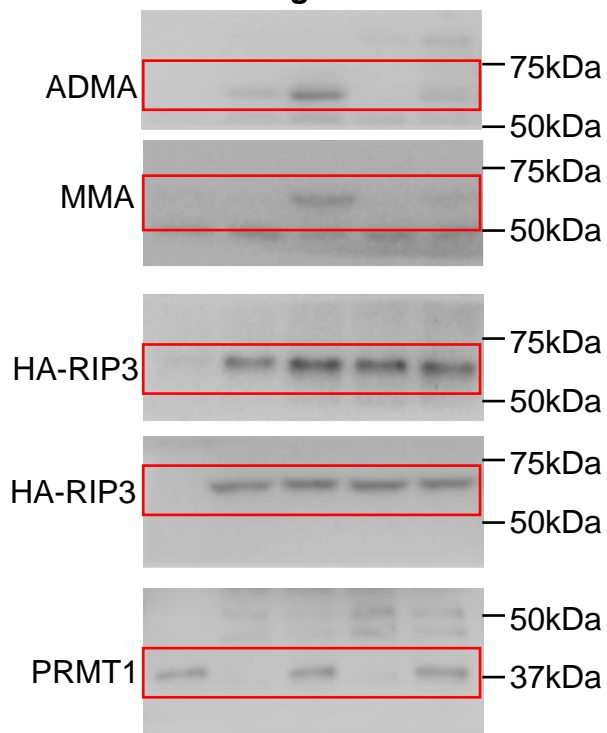

**Fig. 2F**

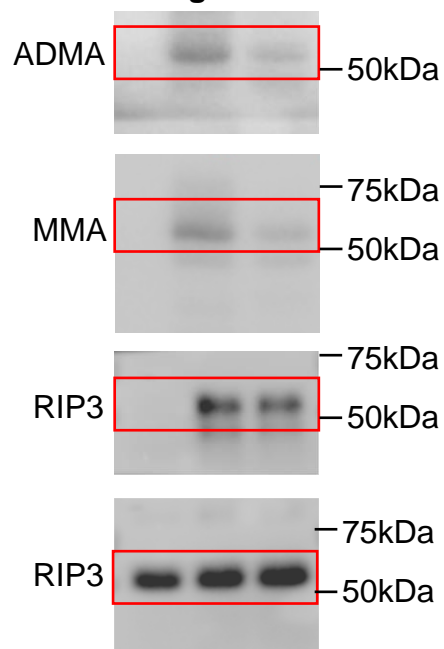

**Fig. 2G**

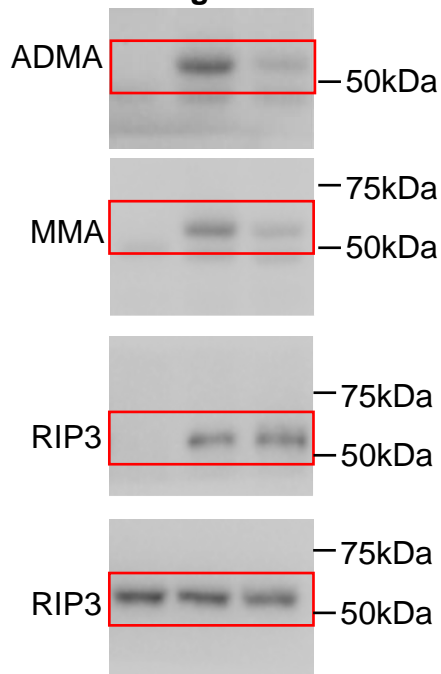

**Fig. 3E**

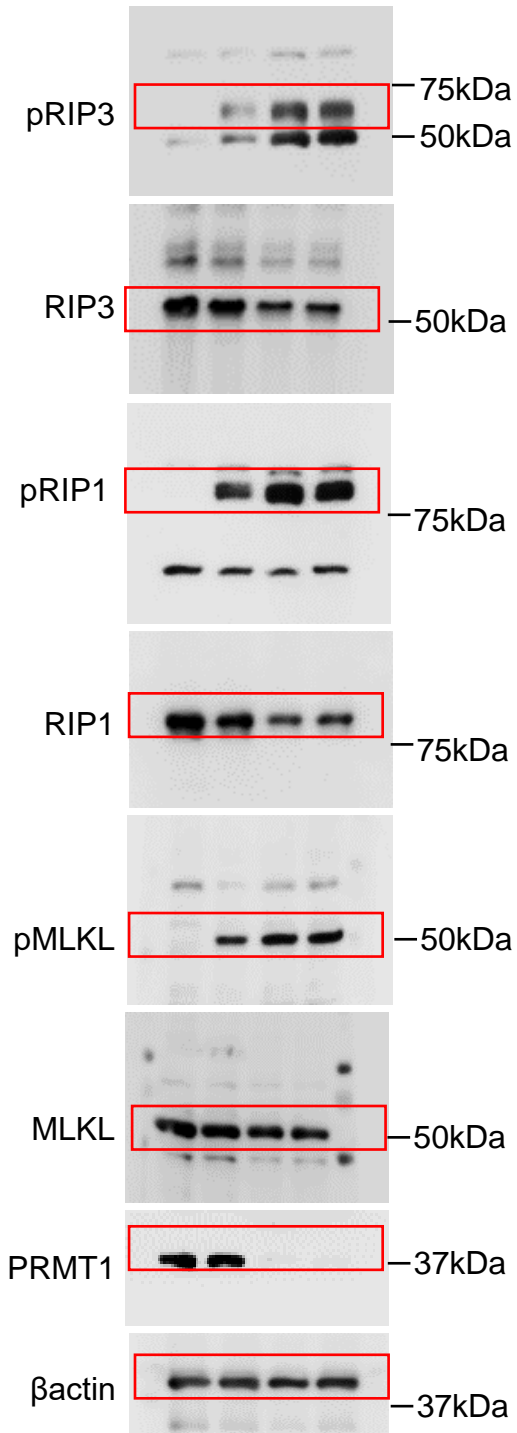

**Fig. 3F**

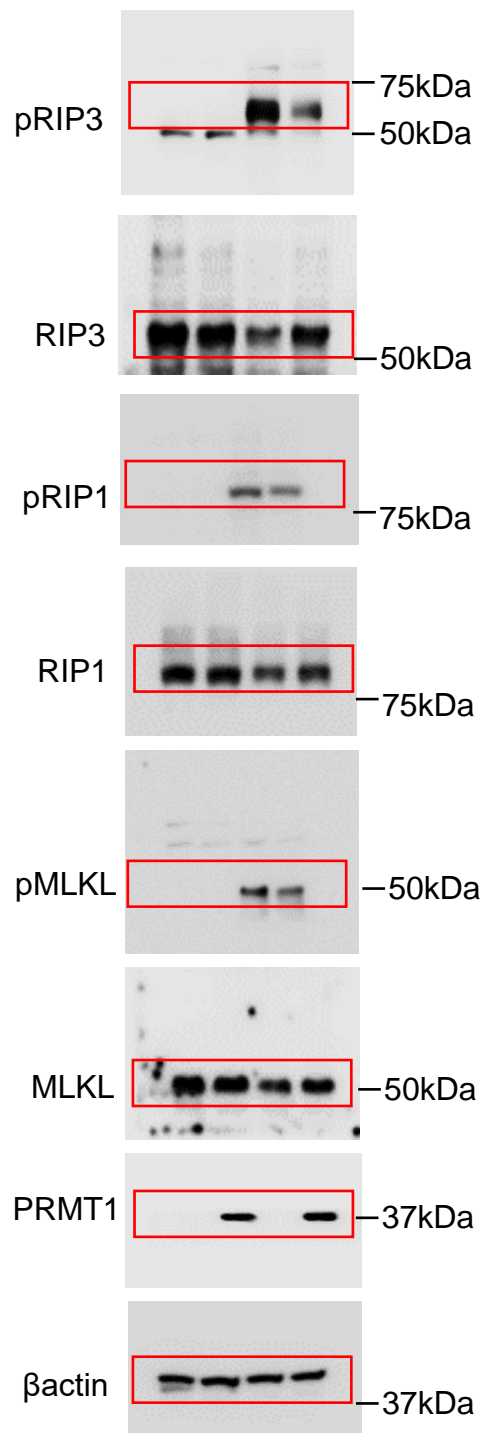

**Fig. 3G**

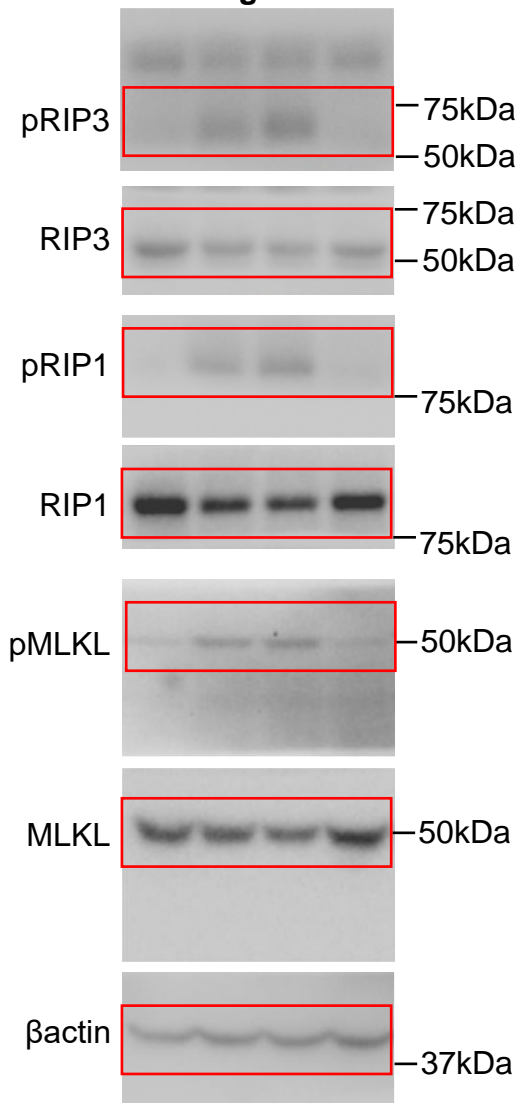

**Fig. 3H**

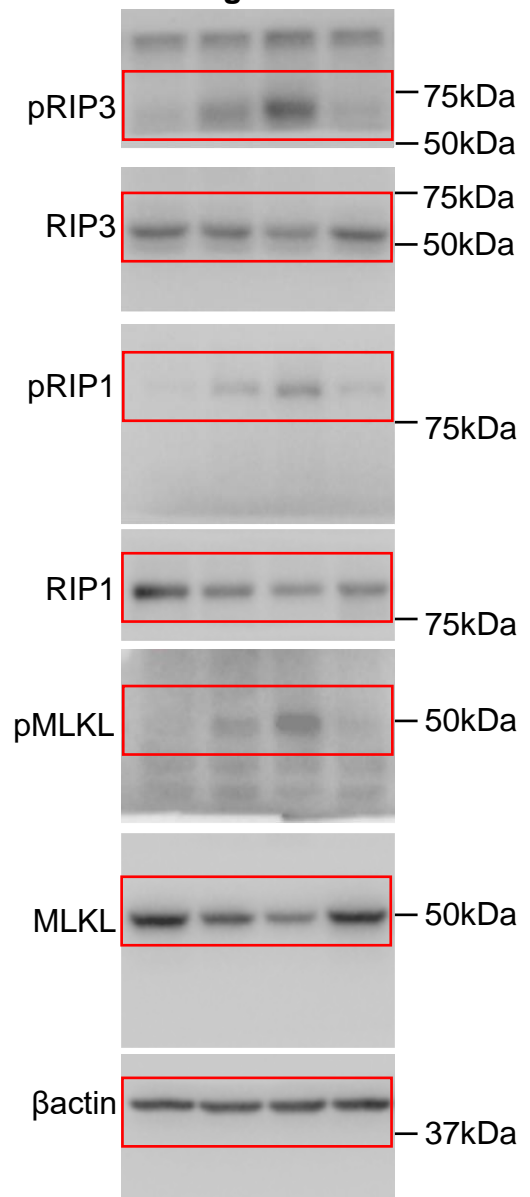

**Fig. 3K**

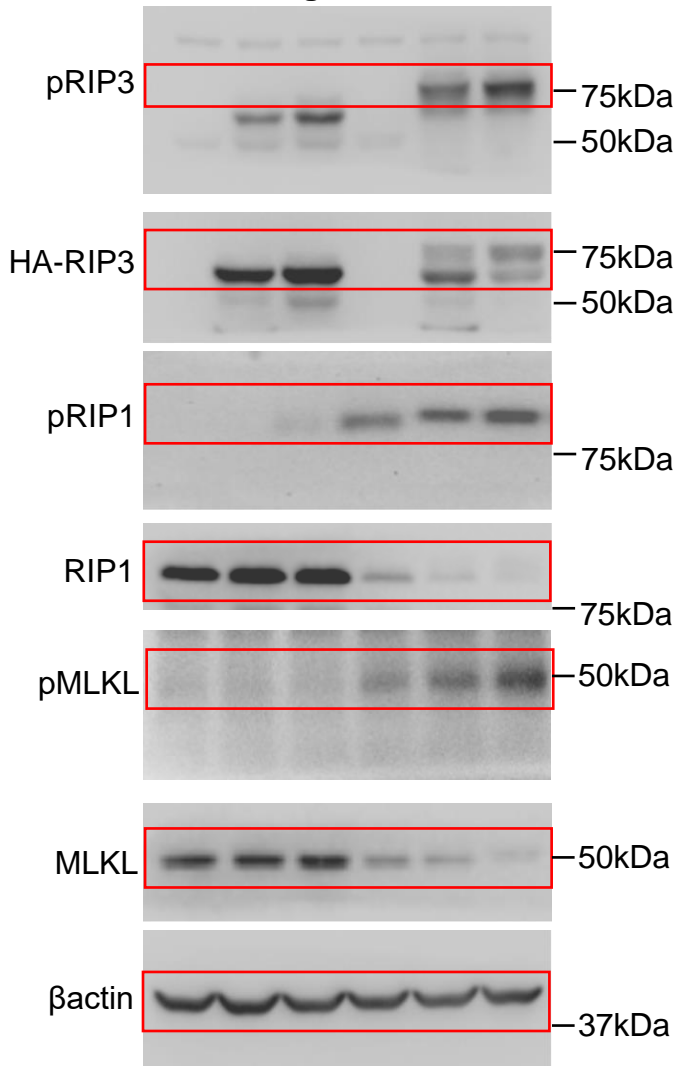

**Fig. 4A**

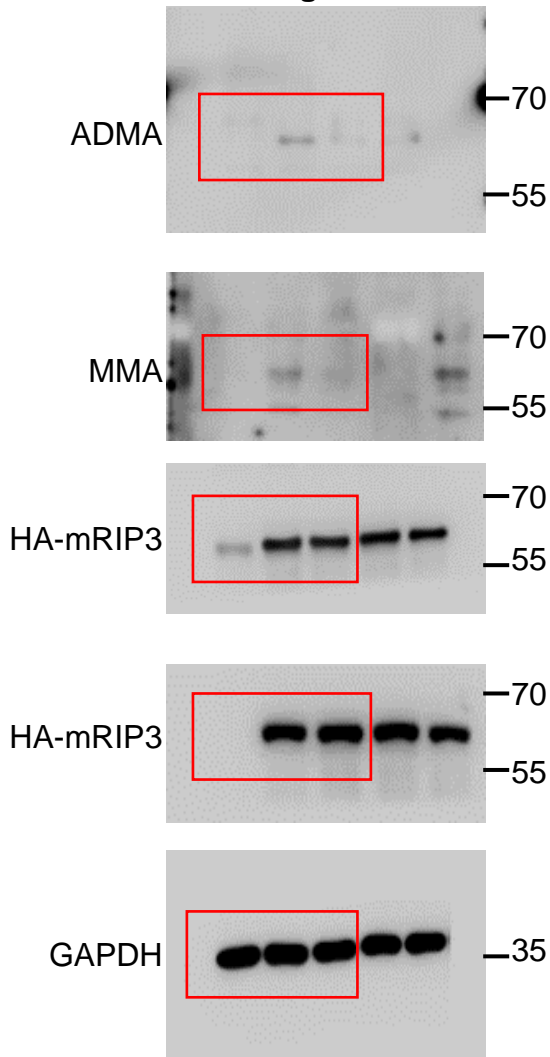

**Fig. 4B**

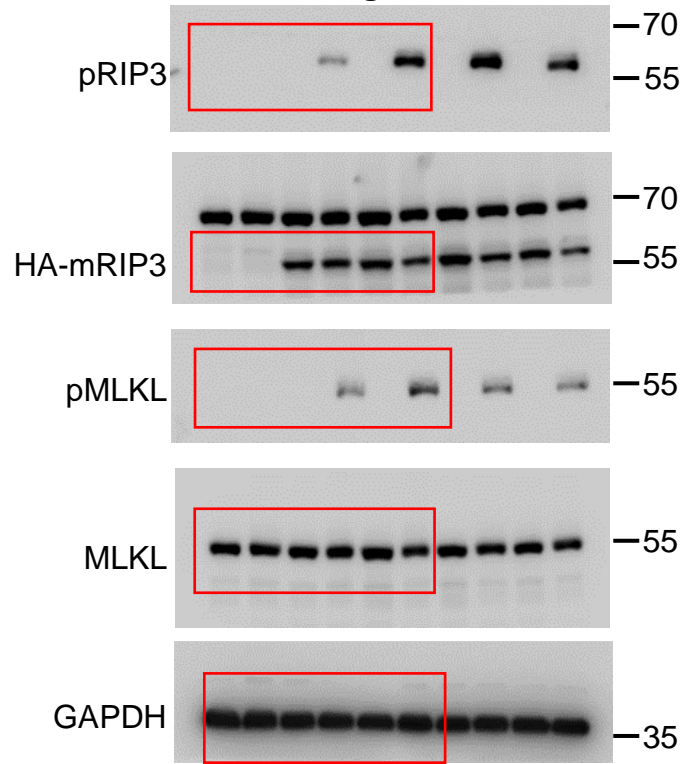



**Fig. 5A**

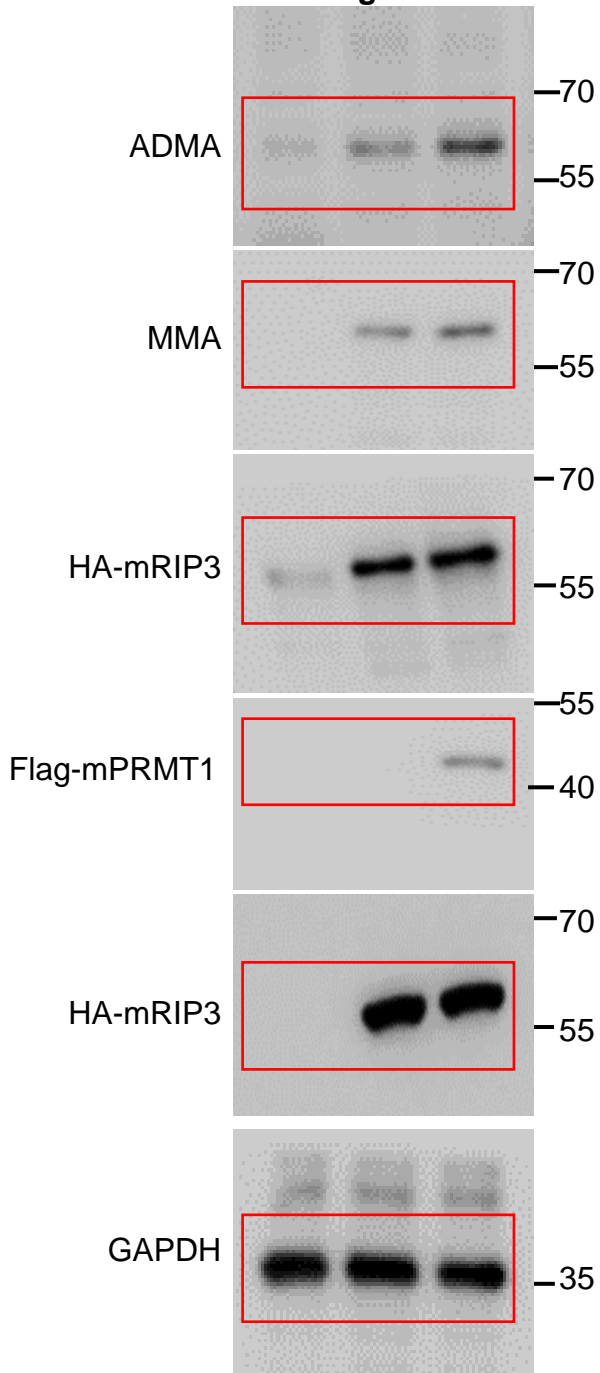

**Fig. 5B**

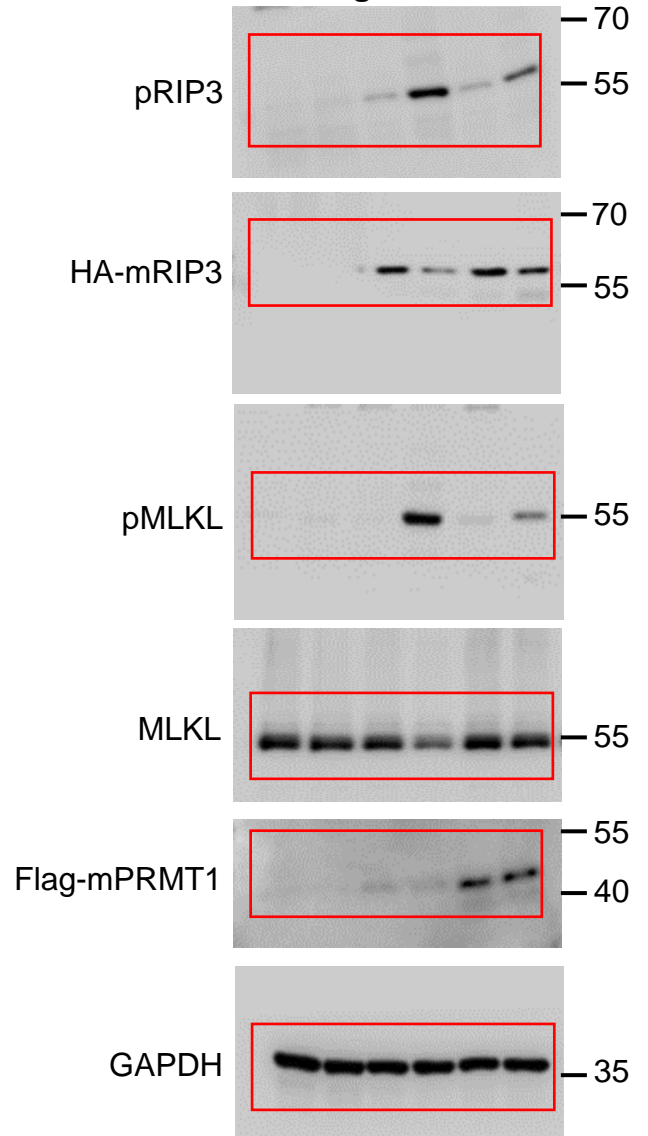

**Fig. 6B**

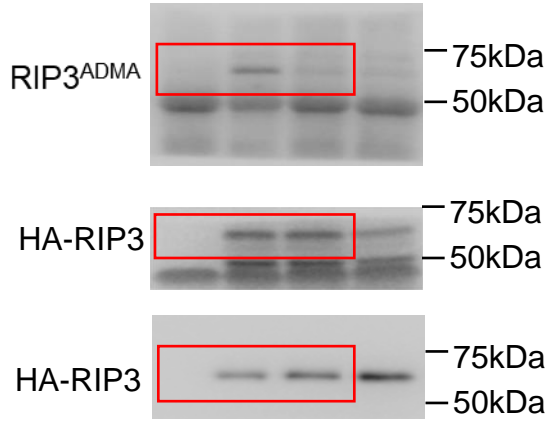

**Fig. 6C**

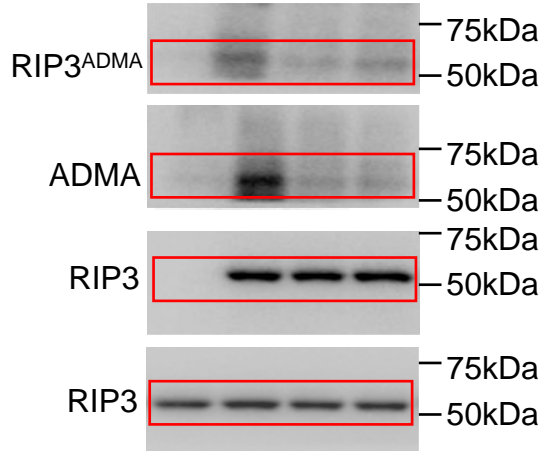

Supplement: 41419_2023_5752_MOESM2_ESM.pdf [file 41419_2023_5752_MOESM2_ESM.pdf]
