# Supplementary material for: PRMT1 reverts the immune escape of necroptotic colon cancer through RIP3 methylation
Source: PubMed Central journal article supplement (PMC10067857; doi:10.1038/s41419-023-05752-w), 2023-04-01
Supplement: 41419_2023_5752_MOESM1_ESM.pdf [file 41419_2023_5752_MOESM1_ESM.pdf]

**Supplementary Information for**  
**PRMT1 reverts the immune escape of necroptotic colon cancer through RIP3**  
**methylation**

Lian Zhang<sup>#</sup>, Yujiao He<sup>#</sup>, Yi Jiang, Qi Wu, Yanchen Liu, Qingqiang Xie, Yuxiu Zou, Jiaqian Wu,  
Chundong Zhang, Zhongjun Zhou<sup>\*</sup>, Xiu-Wu Bian<sup>\*</sup>, Guoxiang Jin<sup>\*</sup>

\*Corresponding author. Email: [gxjinking@163.com](mailto:gxjinking@163.com); [bianxiuwu@263.net](mailto:bianxiuwu@263.net); [zhongjun@hku.hk](mailto:zhongjun@hku.hk)

**This PDF file includes:**

Figures S1 to S6  
Tables S1

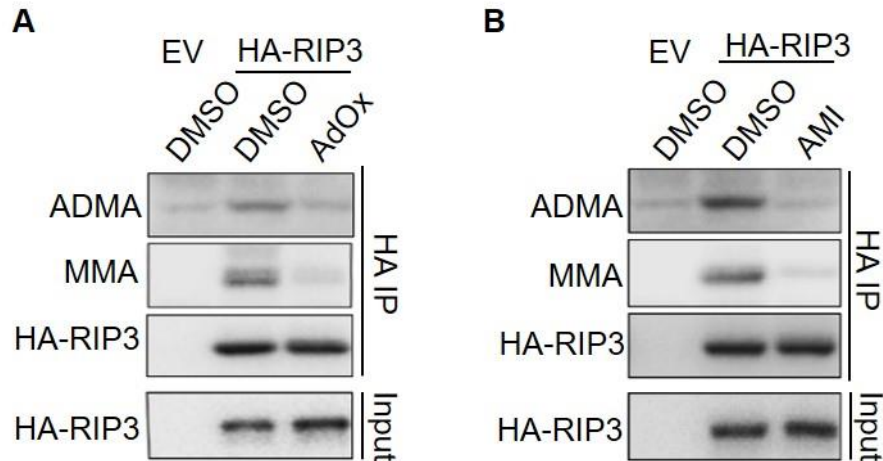

**Figure S1 RIP3 undergoes arginine methylation.** (A) The methylation of overexpressed RIP3 in HEK293T cells treated with or without AdOx was analyzed by immunoprecipitation and immunoblot. (B) The methylation of overexpressed RIP3 in HEK293T cells treated with or without AMI-1 was analyzed by immunoprecipitation and immunoblot.

**HA-RIP3 IP Mass Spectrum**

|                       |                                                                                                   |              |
|-----------------------|---------------------------------------------------------------------------------------------------|--------------|
| sp P07437 TUBB5_HUMAN | Tubulin beta chain OS=Homo sapiens OX=9606 GN=TUBB PE=1 SV=2                                      |              |
| sp Q9Y572 RIPK3_HUMAN | Receptor-interacting serine/threonine-protein kinase 3 OS=Homo sapiens OX=9606 GN=RIPK3 PE=1 SV=2 | <b>RIP3</b>  |
| sp Q71U36 TBA1A_HUMAN | Tubulin alpha-1A chain OS=Homo sapiens OX=9606 GN=TUBA1A PE=1 SV=1                                |              |
| sp P63261 ACTG_HUMAN  | Actin, cytoplasmic 2 OS=Homo sapiens OX=9606 GN=ACTG1 PE=1 SV=1                                   |              |
| sp Q96S66 CLCC1_HUMAN | Chloride channel CLIC-like protein 1 OS=Homo sapiens OX=9606 GN=CLCC1 PE=1 SV=1                   |              |
| sp P09211 GSTP1_HUMAN | Glutathione S-transferase P OS=Homo sapiens OX=9606 GN=GSTP1 PE=1 SV=2                            |              |
| sp P08670 VIME_HUMAN  | Vimentin OS=Homo sapiens OX=9606 GN=VIM PE=1 SV=4                                                 |              |
| sp Q99873 ANM1_HUMAN  | Protein arginine N-methyltransferase 1 OS=Homo sapiens OX=9606 GN=PRMT1 PE=1 SV=3                 | <b>PRMT1</b> |
| sp Q9BY77 PDIP3_HUMAN | Polymerase delta-interacting protein 3 OS=Homo sapiens OX=9606 GN=POLDIP3 PE=1 SV=2               |              |
| sp P61247 RS3A_HUMAN  | 40S ribosomal protein S3a OS=Homo sapiens OX=9606 GN=RPS3A PE=1 SV=2                              |              |
| sp P31943 HNRH1_HUMAN | Heterogeneous nuclear ribonucleoprotein H OS=Homo sapiens OX=9606 GN=HNRNPH1 PE=1 SV=4            |              |
| sp Q53Q00 DHB12_HUMAN | Very-long-chain 3-oxoacyl-CoA reductase OS=Homo sapiens OX=9606 GN=HSD17B12 PE=1 SV=2             |              |

**Figure S2 PRMT1 interacts with RIP3.** Mass spectrum identified PRMT1 as a RIP3 interaction protein.

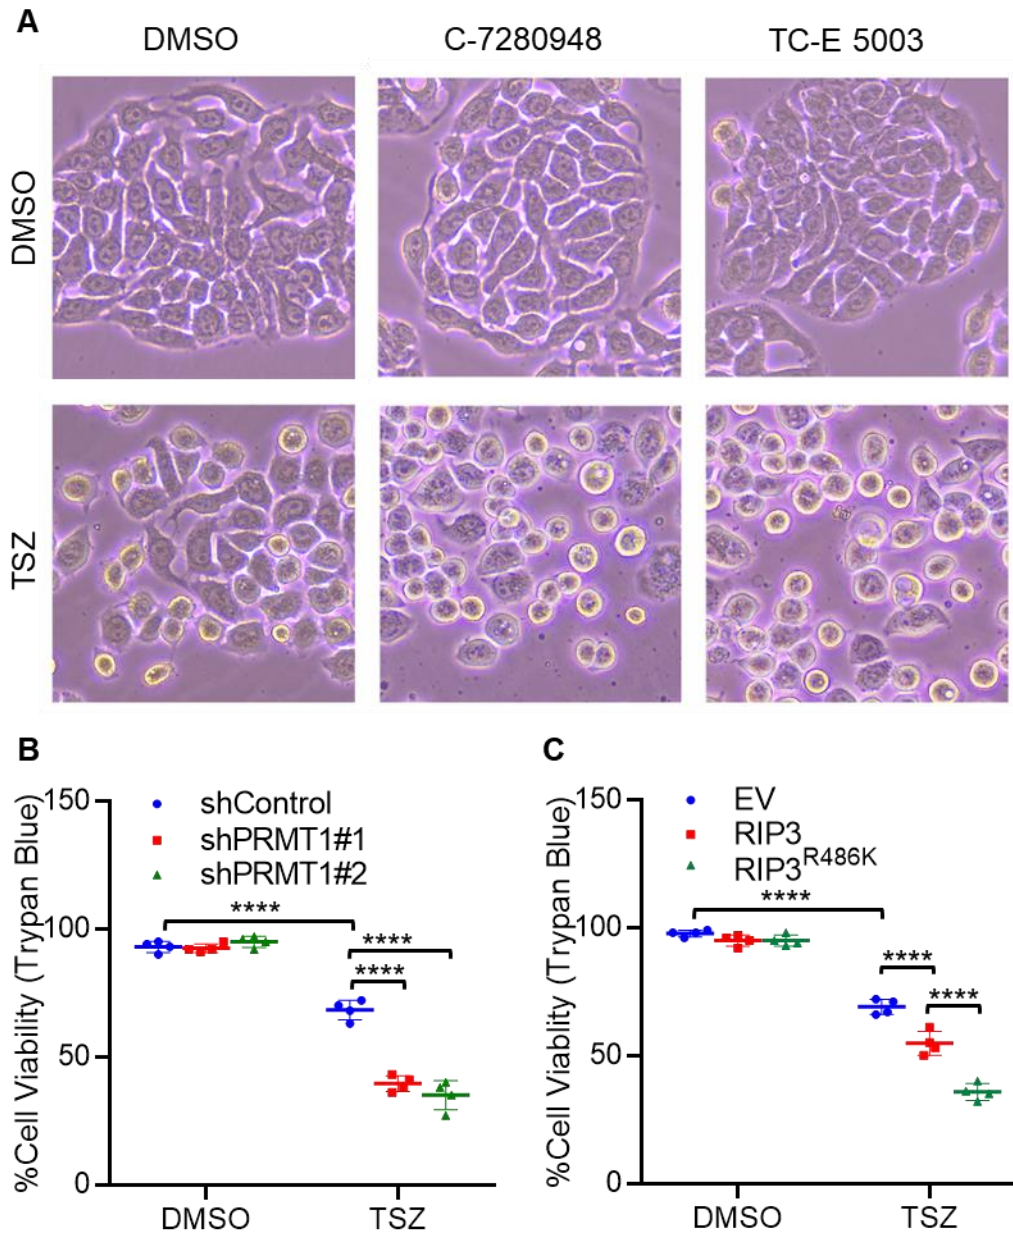

**Figure S3 PRMT1 inhibits necroptosis.** (A) The morphology of HT29 cells treated with or without TSZ and PRMT1 inhibitors C-7280948 (100nM), TC-E 5003 (25nM) for 8 hours. (B) The control and PRMT1 stable knockdown HT29 cells were treated with or without TSZ for 16 hours. Cell viability was calculated by Trypan Blue staining. n=4. \*\*\*\* $P < 0.0001$ . (C) The control (EV), RIP3 and RIP3<sup>R486K</sup> stable overexpression HT29 cells were treated with or without TSZ for 16 hours. Cell viability was calculated by Trypan Blue staining. n=4. \*\*\*\* $P < 0.0001$ .

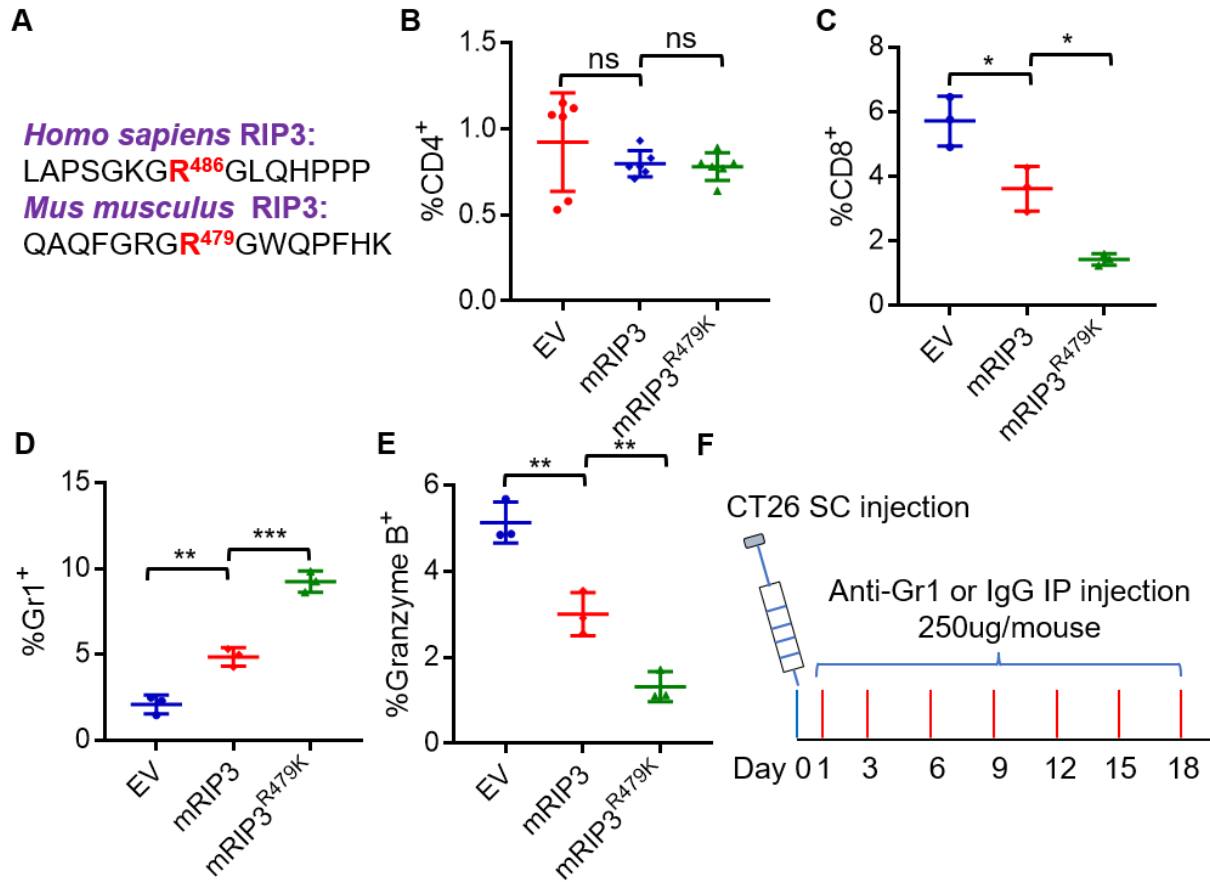

**Figure S4 RIP3 methylation promotes anti-tumor immunity.** (A) Sequence alignment identified murine RIP3 R479 as the homologous amino acid of human RIP3 R486. (B) Flowcytometry statistical analysis of CD4<sup>+</sup> T cell percentage in the control (EV), mRIP3, mRIP3<sup>R479K</sup> stable overexpression CT26 tumors. n=6. ns, not significant. (C) Immunohistochemistry statistical analysis of CD8<sup>+</sup> T cell percentage in the control (EV), mRIP3, mRIP3<sup>R479K</sup> stable overexpression CT26 tumors. n=3. \*P<0.05, \*P<0.05. (D) Immunohistochemistry statistical analysis of Gr<sup>+</sup> MDSC percentage in the control (EV), mRIP3, mRIP3<sup>R479K</sup> stable overexpression CT26 tumors. n=3. \*\*P<0.01, \*\*\*P<0.001. (E) Immunohistochemistry statistical analysis of Granzyme B<sup>+</sup> cytotoxic cell percentage in the control (EV), mRIP3, mRIP3<sup>R479K</sup> stable overexpression CT26 tumors. n=3. \*\*P<0.01, \*\* P <0.01. (F) *In vivo* treatment of anti-Gr1 antibody was performed by intraperitoneal (IP) injection with the dose of 250ug/mouse at day 1,3, 6, 9, 12, 15, 18 after subcutaneously (SC) tumor inoculation.

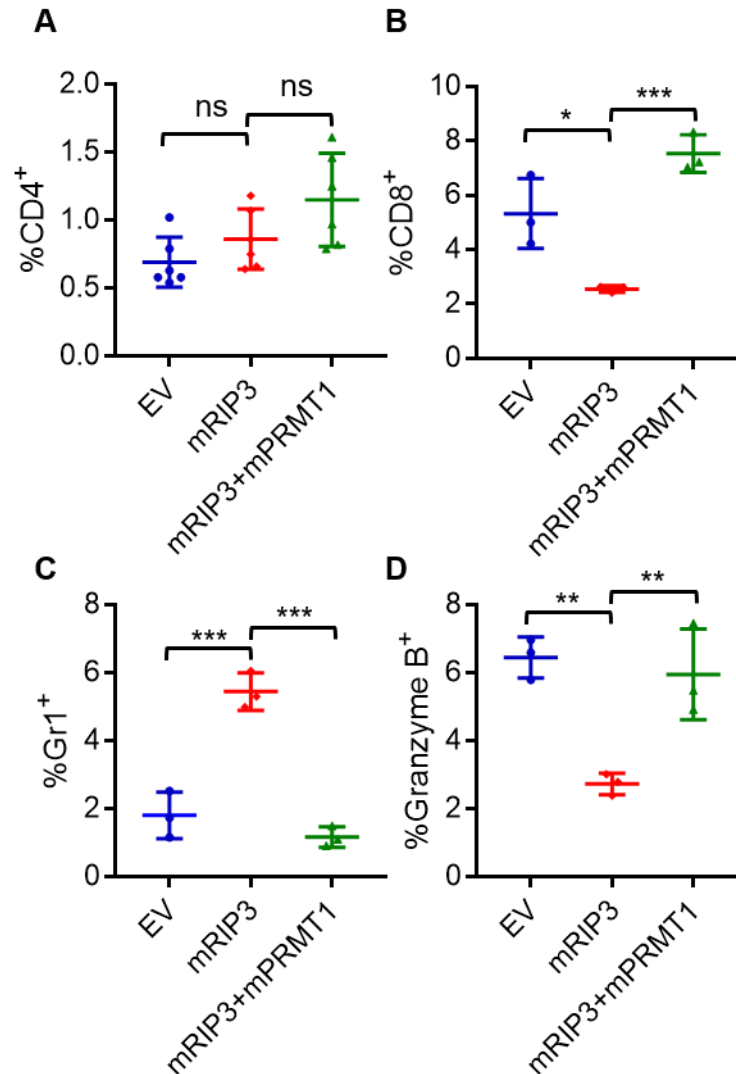

**Figure S5 PRMT1 promotes anti-tumor immunity.** (A) Flowcytometry statistical analysis of CD4<sup>+</sup> T cell percentage in the control (EV), mRIP3, mRIP3+mPRMT1 stable overexpression CT26 tumors. n=6. ns, not significant. (B) Immunohistochemistry statistical analysis of CD8<sup>+</sup> T cell percentage in the control (EV), mRIP3, mRIP3+mPRMT1 stable overexpression CT26 tumors. n=3. \**P*<0.05, \*\*\**P*<0.001. (C) Immunohistochemistry statistical analysis of Gr<sup>+</sup> MDSC percentage in the control (EV), mRIP3, mRIP3+mPRMT1 stable overexpression CT26 tumors. n=3. \*\*\**P*<0.001, \*\*\**P*<0.001. (D) Immunohistochemistry statistical analysis of Granzyme B<sup>+</sup> cytotoxic cell percentage in the control (EV), mRIP3, mRIP3/mPRMT1 stable overexpression CT26 tumors. n=3. \*\**P*<0.01, \*\**P*<0.01.

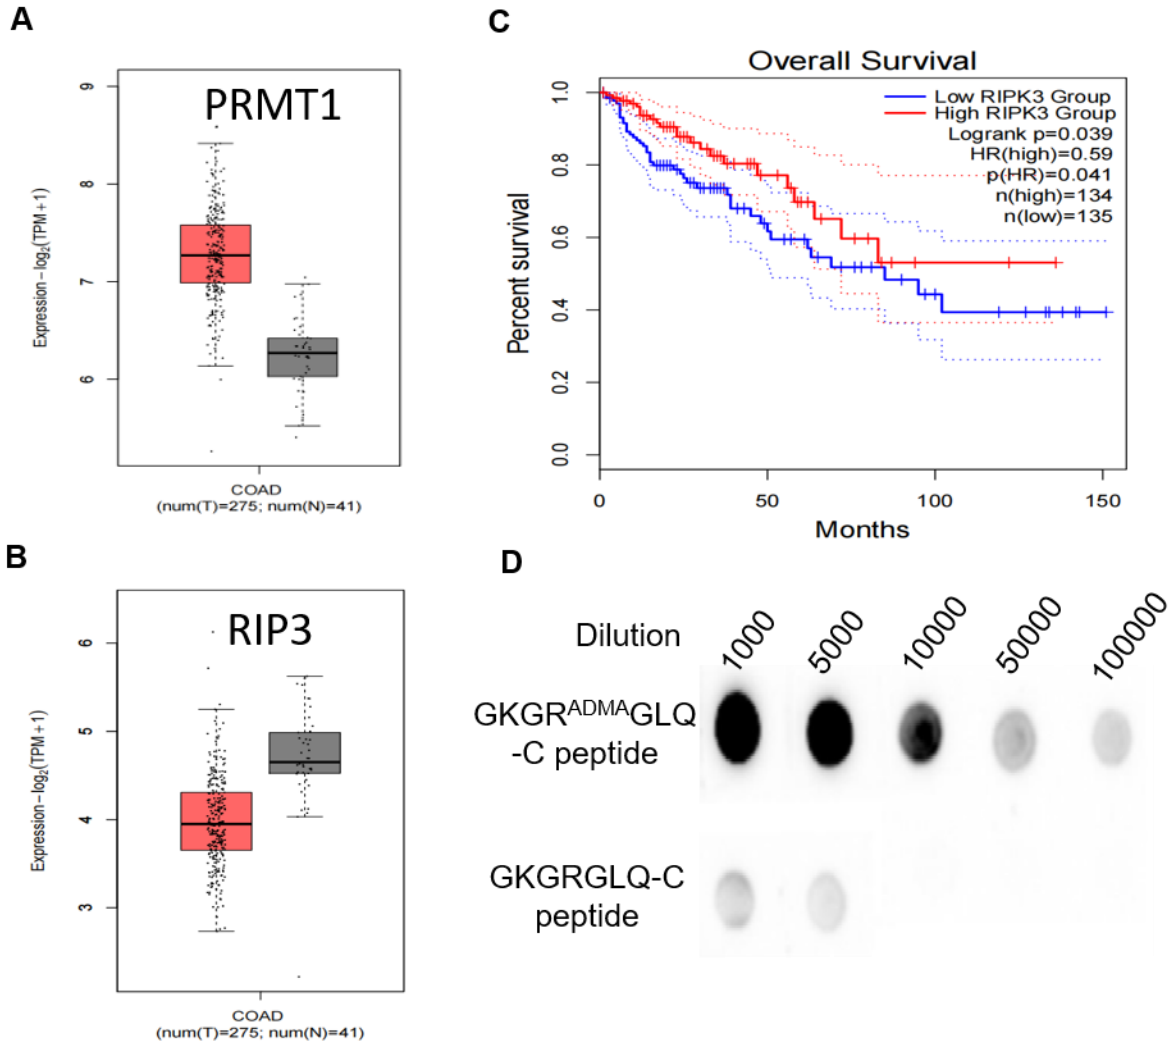

**Figure S6 Clinical analysis of PRMT1 and RIP3 methylation in colon cancer patient samples.** (A) GEPIA analysis of PRMT1 mRNA expression in colon carcinoma tissues and adjacent normal tissues in TCGA database. T, tumor tissues; N, adjacent normal tissues. (B) GEPIA analysis of RIP3 mRNA expression in colon carcinoma tissues and adjacent tissues in TCGA database. T, tumor tissues; N, adjacent normal tissues. (C) GEPIA overall survival analysis of colon carcinoma patients with low and high RIP3 mRNA expression in TCGA database. (D) Dot blot verification of RIP3 R486 methylation specific antibody RIP3<sup>ADMA</sup>.

**Table S1.****List of colon cancer patients.**

| <b>Patient No.</b> | <b>Live-0, Dead-1</b> | <b>Live months</b> | <b>Gender</b> | <b>Age</b> | <b>T</b> | <b>N</b> | <b>M</b> | <b>Stage</b> |
|--------------------|-----------------------|--------------------|---------------|------------|----------|----------|----------|--------------|
| 1                  | 1                     | 13                 | Female        | 47         | T4b      | N0       | M0       | 2            |
| 2                  | 1                     | 12                 | Male          | 65         | T4b      | N2       | M0       | 3            |
| 3                  | 0                     | 68                 | Male          | 71         | T3       | N0       | M0       | 2            |
| 4                  | 0                     | 68                 | Male          | 58         | T3       | N0       | M0       | 2            |
| 5                  | 1                     | 17                 | Male          | 49         | T3       | N0       | M1       | 4            |
| 6                  | 0                     | 68                 | Male          | 72         | T2       | N0       | M0       | 1            |
| 7                  | 0                     | 68                 | Male          | 57         | T4a      | N1       | M0       | 3            |
| 8                  | 1                     | 16                 | Male          | 83         | T3       |          | M0       |              |
| 9                  | 1                     | 27                 | Female        | 66         | T3       |          | M0       |              |
| 10                 | 1                     | 37                 | Female        | 60         | T3       | N1       | M0       | 3            |
| 11                 | 1                     | 26                 | Male          | 47         | T4b      | N1       | M1       | 4            |
| 12                 | 1                     | 25                 | Male          | 57         | T3       | N0       | M1       | 4            |
| 13                 | 0                     | 68                 | Female        | 68         | T3       | N0       | M0       | 2            |
| 14                 | 0                     | 68                 | Male          | 59         | T3       | N0       | M0       | 2            |
| 15                 | 1                     | 14                 | Female        | 58         | T3       | N2       | M0       | 3            |
| 16                 | 1                     | 8                  | Male          | 81         | T3       | N1       | M0       | 3            |
| 17                 | 1                     | 8                  | Female        | 81         | T3       | N0       | M0       | 2            |
| 18                 | 0                     | 67                 | Male          | 60         | T3       | N0       | M0       | 2            |
| 19                 | 1                     | 24                 | Male          | 22         | T3       | N1       | M0       | 3            |
| 20                 | 1                     | 31                 | Female        | 80         | T3       | N2       | M0       | 3            |
| 21                 | 1                     | 29                 | Male          | 84         | T3       | N0       | M0       | 2            |
| 22                 | 1                     | 65                 | Male          | 78         | T3       | N0       | M0       | 2            |
| 23                 | 1                     | 56                 | Male          | 82         | T3       | N0       | M0       | 2            |
| 24                 | 0                     | 67                 | Male          | 53         | T3       | N0       | M0       | 2            |
| 25                 | 1                     | 42                 | Male          | 83         | T3       | N0       | M0       | 2            |
| 26                 | 1                     | 5                  | Male          | 57         | T3       | N1       | M0       | 3            |
| 27                 | 1                     | 23                 | Female        | 64         | T4b      | N0       | M0       | 2            |
| 28                 | 0                     | 67                 | Female        | 63         | T4a      | N0       | M0       | 2            |
| 29                 | 0                     | 67                 | Male          | 53         | T3       | N1       | M0       | 3            |
| 30                 | 1                     | 47                 | Female        | 81         | T3       | N1       | M0       | 3            |
| 31                 | 0                     | 67                 | Male          | 74         | T4a      | N0       | M0       | 2            |
| 32                 | 0                     | 66                 | Male          | 60         | T3       | N0       | M0       | 2            |
| 33                 | 0                     | 66                 | Female        | 78         | T3       | N0       | M0       | 2            |
| 34                 | 1                     | 18                 | Female        | 55         | T3       | N1       | M0       | 3            |
| 35                 | 0                     | 66                 | Female        | 51         | T3       | N0       | M0       | 2            |
| 36                 | 1                     | 16                 | Female        | 53         | T4a      | N0       | M0       | 2            |
| 37                 | 1                     | 20                 | Male          | 56         | T3       | N2       | M0       | 3            |
| 38                 | 1                     | 45                 | Male          | 68         | T3       | N1       | M0       | 3            |
| 39                 | 1                     | 25                 | Female        | 62         | T3       | N2       | M0       | 3            |

|    |   |    |        |    |     |    |    |   |
|----|---|----|--------|----|-----|----|----|---|
| 40 | 1 | 23 | Male   | 77 | T3  | N0 | M0 | 2 |
| 41 | 0 | 65 | Male   | 45 | T2  | N0 | M0 | 1 |
| 42 | 1 | 34 | Male   | 79 | T4a | N0 | M0 | 2 |
| 43 | 0 | 65 | Female | 41 | T3  | N1 | M0 | 3 |
| 44 | 0 | 65 | Male   | 82 | T3  | N0 | M0 | 2 |
| 45 | 1 | 1  | Male   | 70 | T3  | N1 | M0 | 3 |
| 46 | 0 | 65 | Male   | 46 |     |    | M0 |   |
| 47 | 1 | 46 | Female | 78 | T3  | N1 | M1 | 4 |
| 48 | 1 | 26 | Male   | 59 | T3  | N1 | M0 | 3 |
| 49 | 0 | 65 | Male   | 52 | T3  | N0 | M0 | 2 |
| 50 | 0 | 65 | Male   | 69 | T3  | N0 | M0 | 2 |
| 51 | 1 | 27 | Female | 75 | T4b | N2 | M0 | 3 |
| 52 | 0 | 65 | Male   | 70 | T3  | N1 | M0 | 3 |
| 53 | 1 | 25 | Male   | 72 | T3  | N0 | M0 | 2 |
| 54 | 1 | 42 | Female | 61 | T3  | N1 | M0 | 3 |
| 55 | 0 | 65 | Male   | 78 | T3  | N1 | M0 | 3 |
| 56 | 0 | 65 | Male   | 73 | T2  | N0 | M0 | 1 |
| 57 | 1 | 33 | Male   | 85 | T2  | N0 | M0 | 1 |
| 58 | 1 | 14 | Female | 56 | T3  | N0 | M0 | 2 |
| 59 | 0 | 64 | Male   | 45 | T3  | N1 | M0 | 3 |
| 60 | 1 | 30 | Female | 86 | T3  | N1 | M0 | 3 |
| 61 | 0 | 64 | Male   | 76 | T3  | N0 | M0 | 2 |
| 62 | 1 | 15 | Female | 71 | T4b | N1 | M0 | 3 |
| 63 | 1 | 32 | Male   | 80 | T3  | N1 | M0 | 3 |
| 64 | 0 | 64 | Female | 70 |     | N0 | M0 |   |
| 65 | 1 | 16 | Male   | 68 | T3  | N1 | M0 | 3 |
| 66 | 0 | 64 | Male   | 50 | T3  | N0 | M0 | 2 |
| 67 | 0 | 64 | Female | 70 | T3  | N0 | M0 | 2 |
| 68 | 0 | 63 | Male   | 56 |     | N0 | M0 |   |
| 69 | 0 | 63 | Male   | 85 | T3  | N0 | M0 | 2 |
| 70 | 0 | 63 | Female | 71 |     | N0 | M0 |   |
| 71 | 0 | 63 | Female | 77 |     | N1 | M0 | 3 |
| 72 | 0 | 63 | Female | 61 | T4a | N0 | M0 | 2 |
| 73 | 0 | 63 | Female | 60 | T2  |    | M0 |   |
| 74 | 1 | 17 | Male   | 80 | T3  | N0 | M0 | 2 |
| 75 | 0 | 63 | Female | 84 | T3  | N0 | M0 | 2 |
| 76 | 0 | 63 | Female | 63 | T3  | N0 | M0 | 2 |
| 77 | 1 | 1  | Female | 81 |     | N1 | M0 | 3 |
| 78 | 1 | 62 | Female | 87 | T3  | N0 | M0 | 2 |
| 79 | 0 | 63 | Male   | 58 | T3  | N0 | M0 | 2 |
| 80 | 1 | 2  | Female | 58 |     | N1 | M0 | 3 |
| 81 | 0 | 62 | Female | 53 | T4b |    | M0 |   |
| 82 | 1 | 15 | Female | 93 | T4b | N0 | M0 | 2 |
| 83 | 0 | 62 | Female | 22 | T3  | N1 | M0 | 3 |
| 84 | 1 | 27 | Female | 87 | T4a | N1 | M0 | 3 |



|    |   |    |        |    |     |    |    |   |
|----|---|----|--------|----|-----|----|----|---|
| 85 | 1 | 21 | Male   | 82 | T3  | N2 | M0 | 3 |
| 86 | 1 | 48 | Male   | 80 |     | N0 | M0 |   |
| 87 | 1 | 48 | Female | 85 | T3  | N0 | M0 | 2 |
| 88 | 1 | 5  | Male   | 55 | T3  | N2 | M0 | 3 |
| 89 | 1 | 7  | Female | 76 | T4b | N2 | M0 | 3 |
| 90 | 1 | 5  | Male   | 64 | T3  | N0 | M0 | 2 |
| 91 | 1 | 67 | Female | 64 | T3  | N0 | M0 | 2 |
| 92 | 1 | 18 | Female | 67 | T3  | N0 | M0 | 2 |
| 93 | 1 | 12 | Male   | 80 | T3  | N1 | M0 | 3 |
